# Supplementary material for: Forward Genetics Approach Reveals a Mutation in bHLH Transcription Factor-Encoding Gene as the Best Candidate for the Root Hairless Phenotype in Barley
Source: Front Plant Sci. 2018 Sep 3;9:1229. doi: 10.3389/fpls.2018.01229 (PMC6129617; doi:10.3389/fpls.2018.01229)
Supplement: TABLE S1 — The list of markers that were used in the fine mapping of rhl1 gene, their genetic and physical position and the genotyping methods. [file Table_1.xlsx]

## Sheet: Supplementary Table S1
Supplementary Table S1. The list of markers, their genetic and physical position and the genotyping methods that were used in the fine mapping of rhl1 gene
1 - Genetic position of the marker on the reference map in Genome Zipper
2 - Physical position of the marker on 7H chromosome, accoridng to genome assembly version Hv_IBSC_PGSB_v2, START and the END of the sequence is provided
3 - Marker ID accoridng to the first release of barley genome (assembly version 082214v1)
4 - Marker ID accoridng to the second release of barley genome (assembly version Hv_IBSC_PGSB_v2 )
* - markers retrieved from Genome Zipper barley genetic map
** - overlaping genes, according to Ensembl plants database
Colors:
green	markers that were mapped in presented papaer on the genetic map in rhl1 gene region
yellow	genes from physical interval flanked by MLOC_4840 and MLOC_35776 markers on the genetic map of rhl1 gene region
orange	candidate gene encoding a bHLH transcription factor
Marker name		Genetic position1	Physical position2		Genotyping method	Enzyme
MLOC ID3	HORVU ID4	cM	Sequence START [bp]	Sequence END [bp]
MLOC_4579 (2_1491)*	HORVU7Hr1G028840 / HORVU7Hr1G028850**	48.90	53431742 / 53432227**	53442853 / 53446488**	CAPS	MluI
MLOC_36745	HORVU7Hr1G028950		53909725	54117546	CAPS	BshNI
MLOC_61880	HORVU7Hr1G030050		58178807	58183475	InDel	-
MLOC_4840 (3_0752)*	HORVU7Hr1G030210	53.60	59140290	59141279	HRM	-
MLOC_39064	HORVU7Hr1G030220		59281749	59405678	sequencing	-
MLOC_38567	HORVU7Hr1G030250		59304396	59307416	InDel / EcoTILLING	-
MLOC_17531	HORVU7Hr1G030270		59574895	59578109	sequencing	-
MLOC_36656	HORVU7Hr1G030280		59708784	59710757	CAPS	BstUI
MLOC_75365	HORVU7Hr1G030290		59712810	59715186	InDel	-
MLOC_35776	HORVU7Hr1G030300		59718542	59725672	CAPS	BstNI
MLOC_61391	HORVU7Hr1G030840 / HORVU7Hr1G030850**		62236303 / 62239000**	62240935 / 62242500**	CAPS	PstI
MLOC_56157	HORVU7Hr1G031330 / HORVU7Hr1G031350**		63754152 / 63762118**	63761725 / 63765290**	InDel	-
MLOC_56159	HORVU7Hr1G031320		63745345	63750925	CAPS	TaqI
MLOC_58272	HORVU7Hr1G031260		63396714	63397883	CAPS	EcoRI
MLOC_12900	HORVU7Hr1G033430		68707250	68709656	InDel	-
MLOC_74692	HORVU7Hr1G036960		87760583	87761519	InDel	-
