# Supplementary material for: Forward Genetics Approach Reveals a Mutation in bHLH Transcription Factor-Encoding Gene as the Best Candidate for the Root Hairless Phenotype in Barley
Source: Front Plant Sci. 2018 Sep 3;9:1229. doi: 10.3389/fpls.2018.01229 (PMC6129617; doi:10.3389/fpls.2018.01229)
Supplement: TABLE S2 — Primer sequences that were used to amplify fragments of marker sequences subjected to the fine mapping of rhl1 gene region and to amplify the fragment of the candidate gene encompassing the mutation between rhl1.b mutant and its parent variety ‘Karat’. [file Table_2.xlsx]

## Sheet: Supplementary Table S2
Supplementary Table S2. Primer sequences that were used to amplify fragments of marker sequences subjected to the the fine mapping of rhl1 gene region and to amplify the fragment of the candidate gene encompassing the mutation between rhl1.b mutant and its parent variety 'Karat'
1 - Marker ID accoridng to the first release of barley genome (assembly version 082214v1)
2 - Marker ID accoridng to the second release of barley genome (assembly version Hv_IBSC_PGSB_v2 )
* - overlaping genes, according to Ensembl plants database
Colors:
green	markers that were mapped in presented papaer on the genetic map in rhl1 gene region
yellow	genes from physical interval flanked by MLOC_4840 and MLOC_35776 markers on the genetic map of rhl1 gene region
orange	candidate gene encoding a bHLH transcription factor
Marker name		Primer forward	Primer reverse	Notes
MLOC ID1	HORVU ID2
MLOC_4579 (Zip_2_1491)	HORVU7Hr1G028840 / HORVU7Hr1G028850*	GTGTGACCGCCTCTACATCA	GCATAAACCAACTCCACGAGA
MLOC_36745	HORVU7Hr1G028950	GTTGGTGGGTTAGCTCCCTC	CAGGAATGCACGATTGCTCG
MLOC_61880	HORVU7Hr1G030050	CGTCTTTAGGGTCAGGTTGG	CTGGTTGGTGGTTGTCACTG
MLOC_4840 (Zip_3_0752)	HORVU7Hr1G030210	CAGTCTCGCATCTTGAGTTCC	ACTATGGCCAGCCTCAGAGA
MLOC_39064	HORVU7Hr1G030220	TCTTAGGTCTCGTCAGGCCA	CATGGTCACAAGGCAACAGC
MLOC_38567	HORVU7Hr1G030250	CTGTCTAGCTCACGGGTCAC	CGCACGCTTCGACGG	primers used to amplify the fragment with InDel position
MLOC_38567	HORVU7Hr1G030250	TGAAAGCCAGGAATCTCTCC	CAGAAGCAGGGAAACACAGA	primers used to amplify the fragment with A -> T muattion differing rhl1.b mutant and cultivar Karat
MLOC_17531	HORVU7Hr1G030270	GTGGACCGCGACAGGAG	CACCCATTTCCCGCCATCTC
MLOC_36656	HORVU7Hr1G030280	GCACCCCGTACTGTTGTTTG	GAGTCCTCCTGAATTACCGTT
MLOC_75365	HORVU7Hr1G030290	GTGGACCGCGACAGGAG	CACCCATTTCCCGCCATCTC
MLOC_35776	HORVU7Hr1G030300	GGGACGAATTTGGGCAACTG	CACTTGCAGACTCACTCGGT
MLOC_61391	HORVU7Hr1G030840 / HORVU7Hr1G030850*	ATGCTCCTGTATCGACAGCG	CCAATTTTGCAAGGTCGGCA
MLOC_56157	HORVU7Hr1G031330 / HORVU7Hr1G031350*	GCCAGGAAAGGGTCTGATGG	GCTGAAGGAAGTTGTCGTGC
MLOC_56159	HORVU7Hr1G031320	TCATCTGCTTGTATGGAACTGC	CAGCGACGGTAGGGTAACAC
MLOC_58272	HORVU7Hr1G031260	TGCTCCCGATGATGAATGAC	CGTGGGTAGAATGTGTGTGC
MLOC_12900	HORVU7Hr1G033430	CCTCCGCCACTGAGTTAGAG	AATGCCGTATGCTGGTAAGG
MLOC_74692	HORVU7Hr1G036960	GACGAGAAGCGGATGAAGAG	CCAGGGAAAGTGCGTGAG
