# Supplementary material for: Forward Genetics Approach Reveals a Mutation in bHLH Transcription Factor-Encoding Gene as the Best Candidate for the Root Hairless Phenotype in Barley
Source: Front Plant Sci. 2018 Sep 3;9:1229. doi: 10.3389/fpls.2018.01229 (PMC6129617; doi:10.3389/fpls.2018.01229)
Supplement: TABLE S4 — The list of accession numbers for the Arabidopsis bHLH family proteins, together with their classification into subfamilies according to Heim et al. (2003) and Toledo-Ortiz et al. (2003) and the accessions of barley, rice, and Lotus japonicus bHLH proteins that were used to construct the phylogenetic tree. [file Table_4.xlsx]

## Sheet: Supplementary Table S4
Supplementary Table S4. The list of accession numbers for the Arabidopsis bHLH family proteins, together with their classification into subfamilies according to Heim et al., 2003 and Toledo-Ortiz et al., 2003 and the accessions of barley, rice and Lotus japonicus bHLH proteins that were used to construct the phylogenetic tree
The classification of bHLH protein family according to Heim et al., 2003				The classification of bHLH protein family according to Toledo-Ortiz et al., 2003			The accessions of barley, rice and Lotus japonicus bHLH proteins
AGI code	Protein ID	Subfamily		Protein ID	Subfamily		Gene name	Species	Protein ID	Source	References
At3g61950	NP_567121.1	Ia		AAF79643	1		Hvrhl1	barley	n/a	n/a	n/a
At3g24140	NP_189056.2			AAF75809			n/a	barley	A0A287VYJ5	InterPro	n/a
At2g46810	NP_001324834.1			NM118673			n/a	barley	A0A287VYP1	InterPro	n/a
At5g46690	NP_568666.1			NM118672			n/a	barley	A0A287VYQ6	InterPro	n/a
At4g01460	NP_192055.1			NM124557			n/a	barley	A0A287VZA4	InterPro	n/a
At5g65320	NP_201335.1			AAC78547	2		n/a	barley	A0A287VYN6	InterPro	n/a
At1g72210	NP_177366.1			CAB72167			Osrhl1	rice	BAD72512.1	NCBI	Ding et al., 2009
At1g22490	NP_564171.1			CAB72168			n/a	rice	BAD35276.1	NCBI	n/a
At5g53210	NP_200133.2			NM120497			n/a	rice	BAD29274.1	NCBI	n/a
At3g06120	NP_187263.1			CAB71902	3		n/a	rice	AAP44685.1	NCBI	n/a
At1g49770	NP_175399.2	Ib		CAB77716			Ljrhl1	lotus	ACP28172.1	NCBI	Karas et al., 2009
At1g12540	NP_172715.4			AAC33499
At1g62975	NP_683462.1			BAB01355
At4g25410	NP_001320062.1			AAG51804
At4g25400	NP_194270.2			NM102098
At5g51790	NP_199992.2			NM124039
At5g51780	NP_199991.1			BAB11554
At2g41240	NP_850349.1			BAB09783
At5g04150	NP_196035.2			AAF30305
At3g56970	NP_191256.1			AAD20667	4
At3g56980	NP_191257.1			AAF80214
At2g31210	NP_180679.2	II		AAD20666
At2g31220	NP_001318326.1			AAC63587	5
At1g06170	NP_172107.1			AAC63588
At4g21330	NP_193864.1	IIIa		AAC63586
At2g28160	NP_850114.1			CAB38933
At2g16910	NP_179283.2			BAA97026
At5g65640	NP_569014.1	IIIb		BAB09934	6
At5g10570	NP_196619.1			AAG50538
At1g12860	NP_172746.2			BAA95734
At3g26744	NP_189309.2			CAB78483
At1g10610	NP_001321652.1	IIIc		AAL55718
At5g57150	NP_568850.1			NM112876
At4g29930	NP_194722.2			NM114632
At4g16430	NP_193376.1	IIId		AAB72192	7
At1g01260	NP_171634.1			BAB08503
At2g46510	NP_566078.1			CAC14865
At4g00870	NP_567195.1			BAA11933
At1g32640	NP_174541.1	IIIe		AAB62853	8
At4g17880	NP_193522.1			CAB78685
At5g46760	NP_199488.1			AAD20162
At5g46830	NP_199495.1			BAB08920
At4g09820	NP_192720.2	IIIf		CAA17131
At4g00480	NP_191957.2			BAA25078
At5g41315	NP_001332705.1			AAF97322
At1g63650	NP_176552.1			BAA97217
At2g227700	NP_850031.2	IVa		BAA97365	9
At2g22760	NP_179861.2			CAB43668
At2g22750	NP_001324634.1			AAC98450
At4g37850	NP_195498.3			AAF78492
At3g47640	NP_190348.1	IVb		NM113586
At4g36060	NP_849566.1			CAB89386
At3g19860	NP_001326099.1			NM125962
At5g54680	NP_200279.1	IVc		AAC64222
At1g51070	NP_175518.1			CAB79132
At3g23210	NP_001327796.1			AAD39586
At4g14410	NP_849383.1			CAB80472	10
At5g56960	NP_200506.1	IVd		AAF07352
At5g43650	NP_568589.1			BAA95758
At1g69010	NP_177064.1	Va		CAC00740
At5g08130	NP_001119190.1			AAD11998
At1g68810	NP_564944.1	Vb		AAF07356	11
At3g25710	NP_189199.1			CAB93714
At3g56770	NP_191236.1			BAB08642
At2g41130	NP_181646.1			AAF24944	12
At1g68240	NP_176991.2	VI		CAB79668
At1g25310	NP_173902.1			BAA99700
At3g59060	NP_851021.1	VIIa		CAA20199
At2g43010	NP_001323426.1			BAB02240
At1g09530	NP_172424.1			AAD21412
At4g28800	NP_001320084.1			CAB81059
At4g28815	NP_001078463.1			AAF98179
At4g28811	NP_001078462.1			AAF15922
At4g28790	NP_001320083.1			BAB09865	13
At2g20180	NP_001189559.1			CAC05472
At2g46970	NP_182220.2			AAG52051
At3g62090	NP_001078329.1			BAB10287
At1g02340	NP_001323315.1	VIIb		BAB01396	14
At5g61270	NP_200935.2			CAB81011
At4g00050	NP_191916.3			BAA94988
At5g67110	NP_201512.1			AAF63634
At4g63930	NP_568010.1			AAF26082
At3g22100	NP_188848.1	VIIIa		AAB63827
At1g30670	NP_174355.1			AAF87154
At2g34820	NP_181028.2			AAK15282	15
At3g21330	NP_188770.1	VIIIb		BAB10945
At5g67060	NP_201507.1			CAB80359
At3g50330	NP_190602.1			AAC33213
At5g09750	NP_196537.1			AAD24380
At4g00120	NP_191923.1			AAD22130
At1g27740	NP_564293.1	VIIIc		CAB86934
At2g14760	NP_001189527.1			CAA22971-1
At4g33880	NP_195114.2			CAA22971-2
At1g66470	NP_176820.1			CAB81467
At5g37800	NP_198596.1			CAB80763
At2g42280	NP_181757.2	IX		BAB08482
At1g05805	NP_563749.1			AAC34226
At2g43140	NP_973670.1			BAC10690
At1g51140	NP_564583.1			AAB88652	16
At4g09180	NP_192657.1			AAG50543
At1g354460	NP_174776.1			AAG12608
At3g19500	NP_566639.1	X		CAB78042
At3g20640	NP_188700.1			AAC64303
At4g29100	NP_194639.1			AAF29386
At4g21340	NP_193865.2			AAD25805	17
At4g05170	NP_001319872.1			CAB80752
At1g61660	NP_001185284.1			CAA18195
At1g31050	NP_174391.5			AAD03387
At4g30980	NP_001320095.1	XI		BAA97525
At2g24260	NP_180003.1			AAF24852	18
At5g58010	NP_200609.1			AAF25996
At1g03040	NP_563672.1			NP_564229
At4g02590	NP_567245.1			AAD15506
At1g25300	NP_564229.1	XII		CAB80320
At1g73830	NP_177524.2			BAA97208
At1g18400	NP_173276.2			AAF07355
At4g34530	NP_195179.2			AAG29214
At1g68920	NP_177058.1			CAA18832
At1g26280	NP_173950.1			AAF02164
At5g48560	NP_199667.1			BAB10689
At3g07340	NP_187390.1			BAB01846
At1g10120	NP_172483.4			BAA87957
At3g23690	NP_189011.2			AF428350
At2g42300	NP_850368.1			AAC34336
At3g57800	NP_850745.1			CAB67608
At1g59640	NP_849829.1			AAD23713
At5g62610	NP_201067.1			AAF48607
At4g36540	NP_195372.1			AAG27834	19
At2g18300	NP_849976.1			BAB10359
				AAF24948
				CAA19870
				NP201507
				CAB89355
				CAB80770
				BAB03046
				CAB81914
				AAC12822	20
				AAD25754
				NM102341
				AAG13058	21
				BAB11628
